# Supplementary material for: A Mixture of Pure, Isolated Polyphenols Worsens the Insulin Resistance and Induces Kidney and Liver Fibrosis Markers in Diet-Induced Obese Mice
Source: MDPI journal article supplement (doi:10.3390/antiox11010120), 2022-01-05

**Table S1:** Sequences of the primers used in SYBR green assays and references of the probes used in TaqMan assays.

| Primers            | Forward                  | Reverse                 |
|--------------------|--------------------------|-------------------------|
| <i>B2m</i>         | ACTGATACATACGCCTGCAGAGTT | TCACATGTCTCGATCCCAGTAGA |
| <i>M36b4</i>       | AGATGCAGCAGATCCGCAT      | GTTCTTGCCCATCAGCACC     |
| <i>Sod</i>         | AGCTCATCTCAGAGCTCGTCCG   | AGCTCATCTCAGAGCTCGTCCG  |
| <i>Cat</i>         | GTCACCTCAGGTGCGGACATT    | CAGGGTGGACGTCAGTGAAA    |
| <i>Gsr</i>         | CAGTTGGCATGTCATCAAGCA    | CGAATGTTGCATAGCCGTGG    |
| <i>Kim-1</i>       | CTGCTGCTACTGCTCCTTGT     | GGAAGGCAACCACGCTTAGA    |
| <i>Fibronectin</i> | GGAACCAGCAGAGTCCCAA      | ACACCCAGCTTGAAGCCAAT    |
| <i>Chrebpa</i>     | CGACACTCACCCACCTCTTC     | TTGTTCAGCCGGATCTTGTC    |
| <i>Chrebpb</i>     | TCTGCAGATCGGTGGAG        | CTTGTCCCGGCATAGCAAC     |
| <i>Glut1</i>       | GCTTCCTGCTCATCAATCGTAAC  | CATCGGCTGTCCCTCGAA      |
| <i>Txnip</i>       | GTCAGTGTCCCTGGCTCCAAGA   | AGCTCATCTCAGAGCTCGTCCG  |
| <i>Opn</i>         | TTCTCCTGGCTGAATTCTGAGG   | AATCAGTCACTTTCACCGGG    |
| <i>Tgfb</i>        | ACGTCACCTGGAGTTGTACGG    | GGGCTGATCCCGTTGATTTC    |
| <i>Nrf2</i>        | CAGTGGATCCGCCAGCTAC      | GGCAAGCGACTCATGGTCATC   |
| <i>Lcn2</i>        | GGACCAGGGCTGTCGCTACT     | GGTGGCCACTTGCACATTGT    |
| <i>Adiponectin</i> | CAGTGGATCTGACGACACCAA    | TGGGCAGGATTAAGAGGAACA   |

**Figure S1:** GTT curves showing plasma glucose levels after i.p. administration of glucose (1.5 g/kg b.w) in Chow diet, HFD and HFD + Pol fed mice after 7, 14 and 20 weeks of polyphenol-supplementation. Data are presented as the mean  $\pm$  SEM. #  $p < 0.05$ ; ##  $p < 0.01$ ; ###  $p < 0.001$  versus Chow diet-fed animals; \*  $p < 0.05$ ; \*\*  $p < 0.01$  versus HFD-fed animals (n=8-11/group).

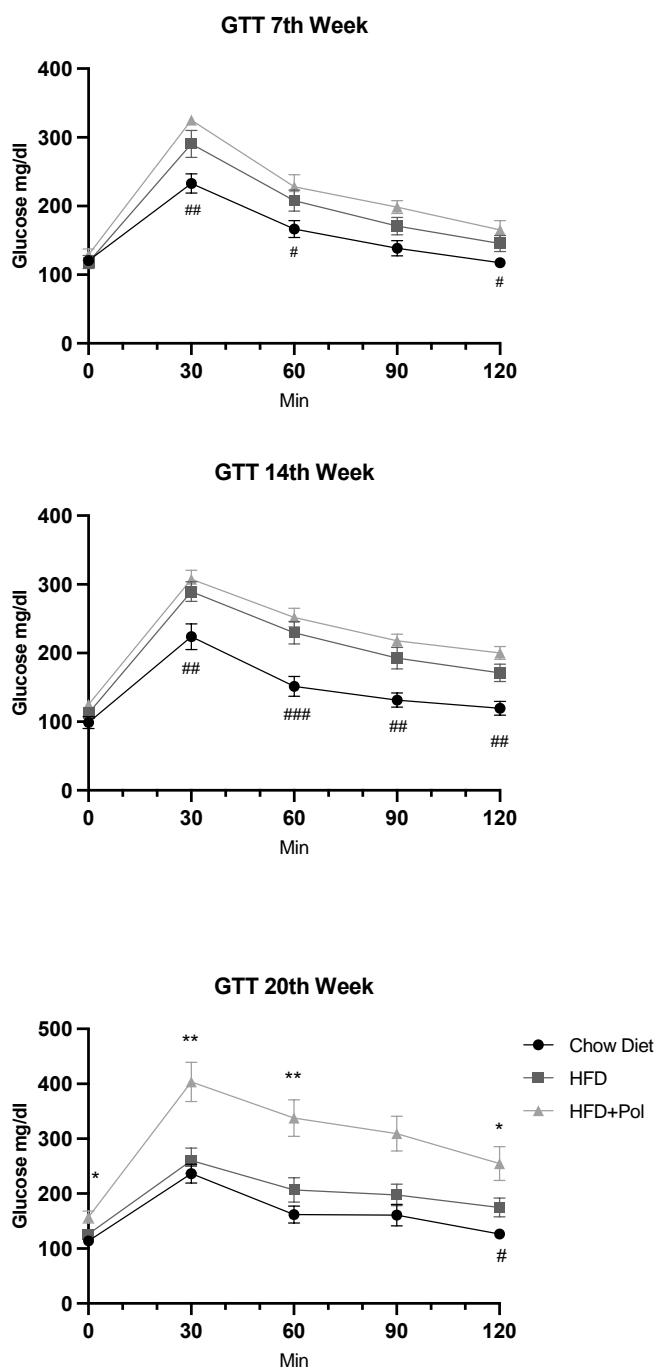

**Figure S2:** ITT curves showing plasma glucose levels after i.p. administration of insulin (0.5 UI/kg b.w) in Chow diet, HFD and HFD + Pol fed mice after 8, 15 and 21 weeks of polyphenol-supplementation. Data are presented as the mean  $\pm$  SEM. #  $p < 0.05$ ; ##  $p < 0.01$  versus Chow diet-fed animals; \*  $p < 0.05$  versus HFD-fed animals (n=8-11/group).

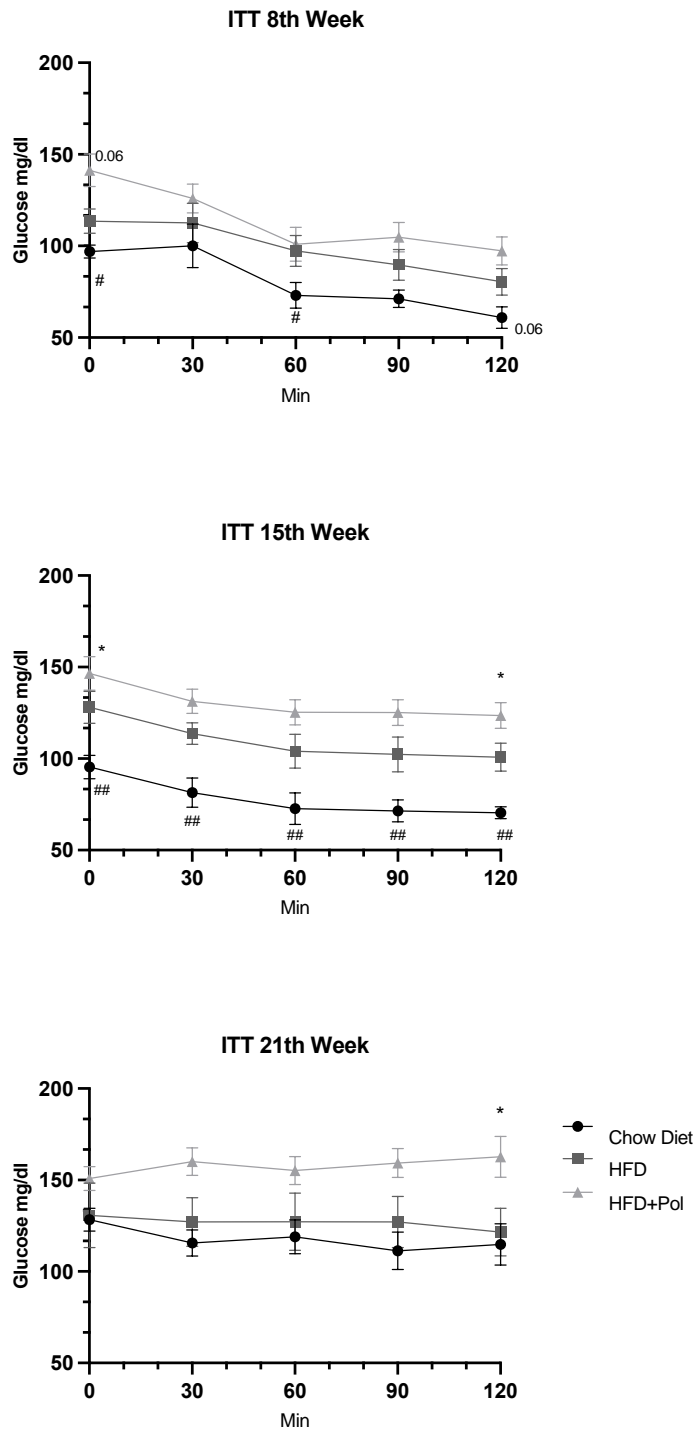

Supplement: s1 [file s1]
